# Supplementary material
Source: PubMed Central journal article supplement (PMC6145768)
Supplement: jamapsychiatry-75-458-s001.pdf [file jamapsychiatry-75-458-s001.pdf]

## Supplementary Online Content

Chan SKW, Chan SWY, Pang HH, et al. Association of an early intervention service for psychosis with suicide rate among patients with first-episode schizophrenia-spectrum disorders. *JAMA Psychiatry*. Published online April 4, 2018.  
doi:10.1001/jamapsychiatry.2018.0185

**eMethods.** Sample Matching Process

**eTable 1.** Details of the Number of Patients Screened and Excluded With Individual Reasons of Exclusion

**eTable 2.** Comparison of Unweighted and Propensity Score Reweighted Patients Characteristics by Early Intervention Group (EI) and Standard Care Group (SC)

**eTable 3.** Details of Mortality and Suicide of Patients in Both Groups Over 12 Years

**eTable 4.** Propensity Score Adjusted Hazard Ratio of Early Intervention Group to Standard Care Group Before and After 3-Year (Outcome: Suicide; Other Causes of Death Are Censored)

**eFigure.** Kaplan-Meier Plot of the Subjects' Survival With Outcome as Suicide

This supplementary material has been provided by the authors to give readers additional information about their work.

**eMethods. Sample Matching Process**

Early intervention (EI) and standard care (SC) group patients were individually matched based on age (+/-2 years), gender and diagnosis, 548 pairs were successfully matched. For unmatched EI patients, diagnosis was matched first and then gender. Two EI patients with psychosis not otherwise specified were matched with SC patients with diagnosis of schizophrenia.

**Standard Mortality Ratio (SMR) calculation**

The person-years-at-risk stratified by age range and gender was calculated based on the mortality rate of Hong Kong (The Mortality Trend in Hong Kong, 1981 to 2015) and the period of follow-up, which gave the number of expected deaths. The number of deaths observed for the same gender and age range in the study divided by the number of deaths expected provided the standardized mortality ratios.

**eTable 1.** Details of the Number of Patients Screened and Excluded With Individual Reasons of Exclusion

|                                                                    | <b>Early<br/>Intervention</b> | <b>Standard<br/>Control</b> |
|--------------------------------------------------------------------|-------------------------------|-----------------------------|
| <b>Total screened cases, n</b>                                     | 805                           | 921                         |
| <b>Included cases, n/total screened cases (%)</b>                  | 617 (76.6)                    | 617 (67.0)                  |
| <b>Excluded cases, n/total screened cases (%)</b>                  | 188 (23.4)                    | 304 (33.0)                  |
| <b>Reason for exclusion, n/total excluded cases (%)</b>            |                               |                             |
| <b>Received &gt;1 month treatment before mental health service</b> | 60 (31.9)                     | 93 (30.6)                   |
| <b>Organic condition</b>                                           | 0                             | 7 (2.3)                     |
| <b>Mental retardation</b>                                          | 8 (4.3)                       | 24 (7.9)                    |
| <b>No diagnosis of psychosis</b>                                   | 10 (5.3)                      | 28 (9.2)                    |
| <b>Delusional disorder</b>                                         | 0                             | 2 (0.7)                     |
| <b>Affective psychosis (depression and mania)</b>                  | 83 (44.1)                     | 83 (27.3)                   |
| <b>Unable to retrieve case records</b>                             | 21 (11.2)                     | 34 (11.2)                   |
| <b>Drug-induced psychosis</b>                                      | 6 (3.2)                       | 33 (10.9)                   |

**eTable 2.** Comparison of Unweighted and Propensity Score Reweighted Patients Characteristics by Early Intervention Group (EI) and Standard Care Group (SC)

| Variable                             | Unweighted |       |       |                    | PS reweighted(IPSW) |       |       |                    |
|--------------------------------------|------------|-------|-------|--------------------|---------------------|-------|-------|--------------------|
|                                      | All        | EI    | SC    | <i>P</i>           | All                 | EI    | SC    | <i>P</i>           |
| <b>Gender<sup>a</sup></b>            |            |       |       | 0.857 <sup>b</sup> |                     |       |       | 0.975 <sup>b</sup> |
| <b>Female</b>                        | 0.480      | 0.483 | 0.478 |                    |                     | 0.478 | 0.477 |                    |
| <b>Male</b>                          | 0.520      | 0.517 | 0.522 |                    |                     | 0.522 | 0.523 |                    |
| <b>Age (1-y increase)</b>            | 21.27      | 21.22 | 21.32 | 0.620 <sup>c</sup> | 21.27               | 21.22 | 21.33 | 0.561 <sup>c</sup> |
| <b>Age of onset (1-y increase)</b>   | 20.53      | 20.45 | 20.62 | 0.379 <sup>c</sup> | 20.53               | 20.47 | 20.61 | 0.485 <sup>c</sup> |
| <b>Education year (1-y increase)</b> | 10.70      | 10.90 | 10.50 | 0.004 <sup>c</sup> | 10.71               | 10.71 | 10.71 | 0.996 <sup>c</sup> |

<sup>a</sup>Gender are expressed as the proportion, age, age of onset and education year are expressed as the mean value.

<sup>b</sup>A two-sides  $\chi^2$  test was used.

<sup>c</sup>A two-sides *t* test was used.

**eTable 3.** Details of Mortality and Suicide of Patients in Both Groups Over 12 Years

|                                                   | <b>Early Intervention<br/>(n = 617)</b> | <b>Standard Care<br/>(n = 617)</b> |
|---------------------------------------------------|-----------------------------------------|------------------------------------|
| <b>Total mortality, N (%)</b>                     | 28 (4.5)                                | 49 (7.9)                           |
| Reason of death (ICD-10 code), N (% of the death) |                                         |                                    |
| Natural Death (A00-Q99) <sup>a</sup>              | 1 (3)                                   | 1 (2)                              |
| Suicide with Clear Intention (X60-X84)            | 4 (14)                                  | 9 (18)                             |
| Suicide with Undetermined Intention (Y10-Y34)     | 23 (82)                                 | 37 (75)                            |
| Unnatural Non-suicide (V01-Y89)                   | 0 (0)                                   | 2 (4)                              |
| <b>Total suicide, N (%)</b>                       | 27 (4.4)                                | 46 (7.5)                           |
| Methods of suicide, N (% of the suicide)          |                                         |                                    |
| Jumping from Height                               | 21 (77)                                 | 32 (69)                            |
| Drug Overdose                                     | 1 (3)                                   | 2 (4)                              |
| Drowning                                          | 2 (7)                                   | 2 (4)                              |
| Hanging                                           | 2 (7)                                   | 4 (8)                              |
| Charcoal Burning                                  | 1 (3)                                   | 2 (4)                              |
| Undetermined method                               | 0 (0)                                   | 4 (8)                              |

<sup>a</sup> Cause of death for one patient of EI group was Diabetic Ketoacidosis and one patient of SC group was Asthma.

ICD-10 code: International Classification of Diseases and Related Health Problems tenth revision

ICD-10 code A00-Q99: death directly caused by disease-initiated events; ICD-10 code V01-Y89: deaths caused by fatal injuries from external events including accidents, violence and suicide.

**eTable 4.** Propensity Score Adjusted Hazard Ratio of Early Intervention Group to Standard Care Group Before and After 3-Year (Outcome: Suicide; Other Causes of Death Are Censored)

|                   | <b>On or before 3-year</b> |       | <b>After 3-year</b> |       |
|-------------------|----------------------------|-------|---------------------|-------|
|                   | HR (95% C.I.)              | p     | HR (95% C.I.)       | p     |
| <b>Full model</b> | 0.32 (0.14, 0.71)          | 0.005 | 0.86 (0.46, 1.61)   | 0.633 |

**eFigure.** Kaplan-Meier Plot of the Subjects' Survival With Outcome as Suicide

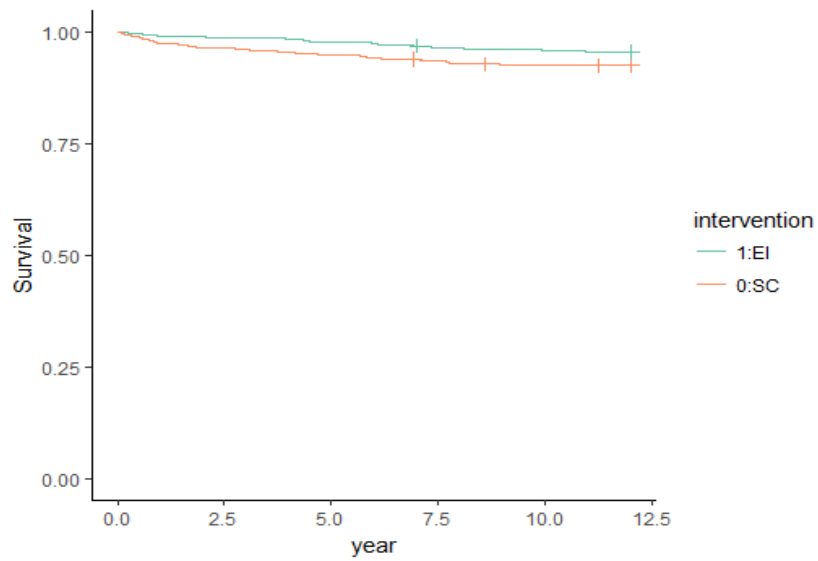

The Kaplan Meier survival analysis with the outcome as suicide over 12 years comparing the patients received early intervention service (EI) and standard care service (SC) found a significant effect of EI service.
